# Supplementary material
Source: PubMed Central journal article supplement (PMC7233541)
Supplement: NIHMS1583179-supplement-1.pdf [file NIHMS1583179-supplement-1.pdf]

Supplementary Table 1. Neuroimaging studies that have examined hippocampal activity during the retrieval of remote and recent memories. The Table list the shortest and longest delays examined in each study, as well as the type of materials that were examined. The relative hippocampal activity for remote and recent conditions is reported such that '>' indicates greater activity for remote than recent, '<' indicates less activity for remote than recent, '=' indicates similar activity for recent and remote, and '?' indicates mixed results.

| Publication                         | Shortest delay | Longest delay | Materials           | Hippocampal activity                   |
|-------------------------------------|----------------|---------------|---------------------|----------------------------------------|
| Addis, Moscovitch et al. ,2004      | 1y             | 36y           | autobio             | =                                      |
| Bernard et al., 2004                | 10y            | 40y           | fam face            | =                                      |
| Bosshardt et al., 2005a             | 1d             | 1m            | wordpairs           | <                                      |
| Bosshardt, Schmidt, 2005b           | 10min          | 1d            | word-pairs          | <                                      |
| Bonnici et al., 2012, 2013          | 2w             | 10y           | autobio             | =                                      |
| Donix et al., 2010                  | 2.5y           | 10y           | autobio             | ? (=elderly; >young)                   |
| Douville et al 2005                 | 10y            | 40y           | fam Name            | ? (= bilateral H, but > right H)       |
| Furman et al 2012                   | hours          | months        | movies              | ? (=recall; >recog)                    |
| Gais et al. ,2007                   | 30min          | 2d            | word-pairs          | <                                      |
| Gilboa, Winocur et al., 2004        | 2y             | 33y           | family photos       | =                                      |
| Haist et al 2001                    | 10y            | 40y           | fam face            | >                                      |
| Harard et al., 2012                 | 3d             | 3m            | photos              | ? (=posterior; >anterior)              |
| Janzen et al. 2008                  | imm            | 12h           | objects             | ? (>good navigators; <poor navigators) |
| Maguire 2001                        | 2w             | 20y           | autobio             | =                                      |
| Maguire & Frigth 2003               | 2w             | 20y           | autobio             | ? (=left H;>right H)                   |
| Milton et al., 2001                 | 36h            | 5m            | photos              | >                                      |
| Piefke et al., 2003                 | 2.5y           | 20y           | autobio             | >                                      |
| Piolino et al., 2004                | 6m             | 7y            | autobio             | <                                      |
| Rekkas& Constable, 2005             | 2.5d           | 8y            | autobio             | <                                      |
| Ritchery et al., 2015               | imm.           | 1 d           | words               | ? (=anterior H; >posterior H)          |
| Rissman et al., 2016??              | 1w             | 3w            | photo               | =                                      |
| Ryan Nadel et al., 2001             | 2y             | 35y           | autobio             | =                                      |
| Soderlund et al., 2012              | 1w             | 10y           | autobio             | =                                      |
| Tsukiura et al., 2002               | 5y             | 15y           | autobio             | =                                      |
| Smith & Squire, 2009                | 1y             | 30y           | news events         | >                                      |
| Stark & Squire 2000                 | 30min          | 1w            | objects             | =                                      |
| Sheldon & Levine, 2013              | 1m             | 1.5y          | autobio             | =                                      |
| Sterinworth, Corkin & Halgren, 2006 | 1y             | 15y           | autobio             | =                                      |
| Takashima et al., 2006              | 1d             | 3m            | photos              | >                                      |
| Takashima et al., 2009              | 15min          | 1d            | face-location assoc | >                                      |
| Viard et al., 2007 (also 2010)      | 6m             | 50y           | autobio             | =                                      |
| Yamashita et al.,2009               | 30m            | 8w            | object pairs        | >                                      |
